# Supplementary material
Source: PubMed Central journal article supplement (PMC8092743)

Draft instructions for self  
collection

# Mouth rinse sample collection for COVID-19 Testing

Please read all instructions before taking your sample

Make sure you are wearing a mask especially if you are doing indoor sample collection

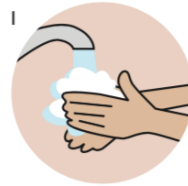

1 Wash your hands with soap and water or hand sanitizer

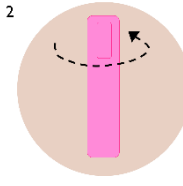

2 Open the pink saline (salt water) vial by twisting the top holding it with your thumb & finger.

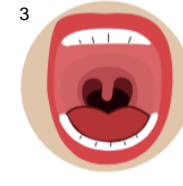

3 Squeeze all of the saline into your mouth, **but do not swallow it.**

Put your face mask back on.

Pull your face mask down below your mouth, if you are wearing one.

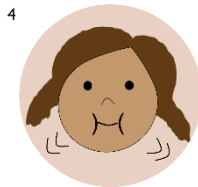

4 Rinse your mouth for 5 seconds by swishing the saline in your mouth. Then tilt head back and gargle for 5 seconds.

Repeat swishing and gargling 3 times for a total of 30 seconds.

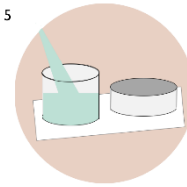

5 Twist the cap off the container.

Pull your face mask down and spit the liquid from your mouth into the container. Put your face mask back on

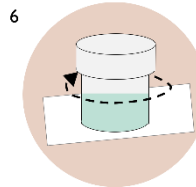

6 Put the lid back on the container and screw on tightly.

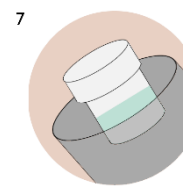

7 Put container in the plastic bag.

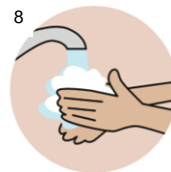

8 Wash your hands with soap and water or hand sanitizer .

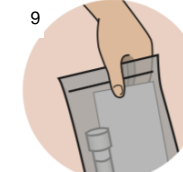

9 Give the bag back to your health care provider.

# Saliva Sample

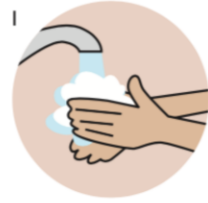

1 Wash your hands with soap and water.

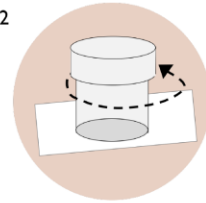

2 Spread a paper towel down on a flat surface.  
Twist the cap off the container

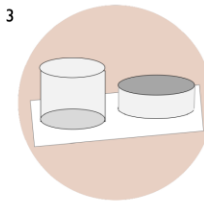

3 Put the lid with the inside surface facing up on the paper towel.

**Don't eat, drink, smoke, or chew gum for 1 hour before providing your saliva sample.**

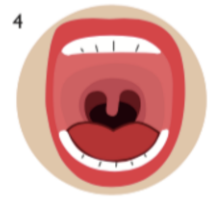

4 Swallow and bring up saliva from the back of your throat

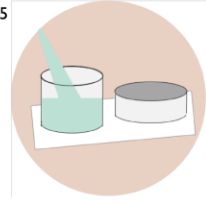

5 Spit into the tube until your saliva reaches the marked line at 10ml.

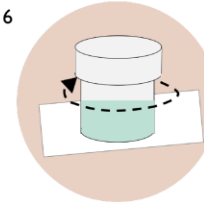

6 Put the lid back on the container.

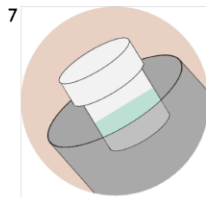

7 Put container in the plastic bag.

## **If you're having trouble creating saliva:**

- Think about your favorite food
- Gently rub your cheeks from the outside (pressing them against your teeth and gums)

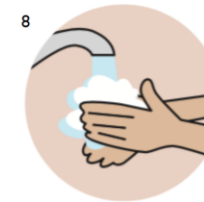

8 Wash your hands with soap and water.

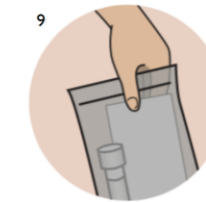

9 Give the bag back to the nurse.

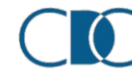

Supplement: JCM.02427-20-s0001.pdf [file JCM.02427-20-s0001.pdf]
